1 **Adaptive divergence in the eyes of *Heliconius* butterflies likely contributes**  
2 **to pre- and post-mating isolation.**

3

4 Daniel Shane Wright<sup>1</sup>, Juliana Rodriguez-Fuentes<sup>1,b</sup>, Lisa Ammer<sup>1</sup>, Kathy Darragh<sup>2,3,a</sup>,  
5 Chi-Yun Kuo<sup>1</sup>, W. Owen McMillan<sup>3</sup>, Chris D. Jiggins<sup>2,3</sup>, Stephen H. Montgomery<sup>3,4</sup>,  
6 Richard M. Merrill<sup>1,3</sup>

7

8 <sup>1</sup> *Division of Evolutionary Biology, Faculty of Biology, Ludwig Maximilian University of*  
9 *Munich, Munich, Germany*

10 <sup>2</sup> *Department of Zoology, University of Cambridge, Cambridge, United Kingdom*

11 <sup>3</sup> *Smithsonian Tropical Research Institute, Panama*

12 <sup>4</sup> *School of Biological Science, University of Bristol, Bristol, United Kingdom*

13

14 <sup>a</sup> *Current address: Department of Evolution and Ecology, UC Davis, Davis, USA*

15 <sup>b</sup> *Current address: Division of Evolutionary Ecology, University of Bern, Switzerland*

16

17 Corresponding authors: DSW ([dswright@bio.lmu.de](mailto:dswright@bio.lmu.de)) & RMM ([merrill@bio.lmu.de](mailto:merrill@bio.lmu.de))

18

19

20

21

22

23

24 **Abstract**

25 When populations experience different sensory conditions, natural selection may favor whole  
26 sensory system divergence, from the peripheral structures to the brain. We characterized the  
27 outer eye morphology of sympatric *Heliconius* species from different forest types, and their  
28 first-generation reciprocal hybrids to test for adaptive visual system divergence and hybrid  
29 disruption. In Panama, *Heliconius cydno* occurs in closed forests, whereas *Heliconius*  
30 *melpomene* resides in more open areas. Previous work has shown that, among wild  
31 individuals, *H. cydno* has larger eyes than *H. melpomene*, and there are heritable, habitat-  
32 associated differences in the visual brain structures that exceed neutral divergence  
33 expectations. Notably, hybrids have intermediate neural phenotypes, suggesting disruption.  
34 To test for similar effects in the visual periphery, we reared both species and their hybrids in  
35 common garden conditions. We confirm that *H. cydno* has larger eyes and provide new  
36 evidence that this is driven by selection. Hybrid eye morphology is more *H. melpomene*-like  
37 despite body size being intermediate, contrasting with neural trait intermediacy. Thus, eye  
38 morphology differences between *H. cydno* and *H. melpomene* are consistent with adaptive  
39 divergence, and when combined with previous neuroanatomy data, suggest hybrid visual  
40 system disruption due to mismatched patterns of intermediacy and dominance in the visual  
41 pathway.

42

43 **Keywords:** sensory adaptation, selection, visual system, hybrid disruption

44

45

46

47

48

## 49 **Introduction**

50 Sensory systems mediate the transmission of information between an organism and its  
51 surroundings (Stevens, 2013). Natural selection is expected to favor divergent sensory  
52 phenotypes across populations exposed to different sensory conditions and/or which exploit  
53 different resources, potentially leading to both pre- and post-mating reproductive  
54 isolation (Dell'Aglio et al., 2023). Habitat-associated variation in sensory traits is well-  
55 documented, particularly for vision (Webster, 2015). However, most studies of visual  
56 adaptation between populations have focused on color vision in aquatic organisms (Carleton  
57 & Yourick, 2020; Cummings & Endler, 2018), whereas other aspects of visual perception are  
58 understudied. For example, we know little about how visual signals are evaluated (Rosenthal,  
59 2018) or how adaptive processes operate at different levels within the visual pathway.  
60 Moreover, we lack information on the visual capabilities of hybrids despite their potential to  
61 contribute to reproductive isolation between species. Here, we characterize the outer eye  
62 morphology of *Heliconius* butterflies, examine evidence for adaptive divergence, and  
63 consider how this may lead to the disruption of visual systems in hybrids.

64       The compound eyes of insects represent an easily quantifiable sensory structure that  
65 directly affects visual perception. The insect compound eye consists of numerous  
66 independent photosensitive units, ommatidia, each of which receives visual (light)  
67 information and transfers it to the brain. Variation in the total number of ommatidia, their  
68 size, and density directly affects visual perception and often correlates with temporal activity  
69 (Greiner, 2006; Land, 1997; Stöckl et al., 2017; Warrant, 2004). For example, nocturnal and  
70 crepuscular species often have larger eyes and larger facets to enhance photon sensitivity in  
71 light-poor environments, as observed across insect taxa (Freelance et al., 2021). Associations  
72 between the local environment and the visual systems of diurnal insects are less studied and  
73 often included only as a comparison to other nocturnal species (e.g., Frederiksen & Warrant,

74 2008). Nonetheless, the conditions experienced by diurnal insects can vary greatly (Endler,  
75 1993), and may represent important adaptations to the local environment.

76 *Heliconius* butterflies inhabit tropical and subtropical regions of the Americas and  
77 rely heavily on vision for foraging for both flowers and hostplants (Dell’Aglia et al., 2016;  
78 Gilbert, 1982), as well as finding and choosing suitable mates (Crane, 1955; Estrada &  
79 Jiggins, 2008; Hausmann et al., 2021; Jiggins et al., 2001; Merrill et al., 2019). In Panama,  
80 the closely related species *Heliconius melpomene* and *Heliconius cydno* are broadly  
81 sympatric, but occupy different forest types (Estrada & Jiggins, 2002). *H. melpomene*  
82 primarily lives in forest edge habitats, whereas *H. cydno* occurs deeper within the forests,  
83 with less light and increased habitat complexity (Fig. 1A) (DeVries, 1987; Estrada & Jiggins,  
84 2002; Seymoure, 2016). Although patterns of opsin expression suggest few differences in  
85 wavelength sensitivity (McCulloch et al., 2017), recent data on brain morphologies of *H.*  
86 *melpomene* and *H. cydno* reported heritable differences in the size of the visual neuropils that  
87 exceed expected rates of neutral divergence (Montgomery et al., 2021). Using wild caught  
88 individuals, Seymoure et al. (2015) similarly found that i) *H. cydno* has larger eyes than *H.*  
89 *melpomene* and ii) that *H. cydno* males have larger eyes than *H. cydno* females (intraspecific  
90 differences in *H. melpomene* were non-significant). However, these results were based on  
91 individuals sampled as adults in their respective habitats and may include effects of  
92 environment-induced plasticity. Also, total ommatidia counts were measured for only two  
93 individuals for each species and sex, so statistical power to explore different eye morphology  
94 traits was limited.

95 Given the evidence for selection acting on the visual processing regions of the brain, a  
96 more thorough examination of the visual periphery in these species is warranted. In  
97 particular, the role of plasticity and selection, and the potential for the mismatch of  
98 components of the visual system in interspecific hybrids have not yet been assessed. To

99 address this, we characterized the outer eye morphology of *H. melpomene* and *H. cydno* to  
100 test for patterns of adaptive divergence in the visual system. First, we compared the eye  
101 morphology of butterflies (15+ for each species and sex) reared under common garden  
102 conditions. We then used a quantitative genetics approach to test if the species-specific eye  
103 differences are due to selection using  $P_{ST}$ - $F_{ST}$  analysis. Finally, we report patterns of eye  
104 morphology in first-generation (F1) hybrids of *H. melpomene* and *H. cydno*.

105

## 106 **Methods**

### 107 Butterfly specimens

108 We established outbred stocks of *Heliconius cydno chioneus* (C) and *Heliconius melpomene*  
109 *rosina* (M) from butterflies caught in Gamboa and the nearby Soberanía National Park,  
110 Panama between 2007-2009 and 2015-2017. We generated reciprocal F1 hybrids between *H.*  
111 *cydno* and *H. melpomene* by either crossing a *H. cydno* female with *H. melpomene* a male  
112 (CxM), or a *H. melpomene* female with a *H. cydno* male (MxC). All pure individuals and  
113 hybrids were reared under common garden conditions in the Smithsonian Tropical Research  
114 Institute insectaries in Gamboa, and all specimens were preserved in DMSO/EDTA/NaCl and  
115 stored at -80° C as described in Merrill et al. (2019).

116

### 117 Sample preparation

118 Samples were prepared following previously published methods (Seymour et al., 2015;  
119 Wright et al., 2023). In brief, we thawed specimens at room temperature, and dissected out  
120 both eyes and the hind legs. The legs were immediately imaged (see below), while the eyes  
121 were placed in 20% sodium hydroxide (NaOH) for 18-24 hours to loosen the tissues behind  
122 the cuticular cornea. The following day, we cleaned each eye cuticle of excess tissue and

123 mounted it on a microscope slide in Euparal (Carl Roth GmbH). The sample was left to dry  
124 overnight before imaging.

125

### 126 Image analysis

127 We used ImageJ/Fiji (Schindelin et al., 2012) to analyze each mounted cornea for the total  
128 number of facets and total corneal area. All slides were imaged at 7.5x on a Leica M80  
129 stereomicroscope fitted with a Leica Flexacam C1 camera and the *Leica Application Suite X*  
130 (LAS X) software. Each image contained a 1mm scale bar for calibration. Facet counts were  
131 measured via image thresholding and the *Analyze particles* function, and corneal surface area  
132 was measured with the *Freehand selection* and *Measure* options (full protocol provided as  
133 supplementary methods). This semi-automated method differs slightly from the approach  
134 used by Seymoure et al. (2015) but gives quantitatively similar results (Fig. S1). To account  
135 for differences in body size, we measured hind tibia length using the *Straight line* and  
136 *Measure* options. The number of facets (Pearson's  $r$  [95% C.I.]:  $r(118) = 0.969$  [0.956,  
137 0.978]), corneal area ( $r(118) = 0.986$  [0.979, 0.990]) and hind tibia length ( $r(101) = 0.930$   
138 [0.898, 0.952]) on the left vs. right sides of the butterfly were highly correlated. Therefore,  
139 for all subsequent analyses, we used only the left eye and left leg unless either was missing,  
140 damaged or had poor image quality (i.e., not all facets visible), then the right side was  
141 substituted.

142

### 143 Statistical analysis

144 *Eye morphology.* We used linear models (lm function) in R to explore how facet count and  
145 corneal area are influenced by *species* (*H. cydno* vs. *H. melpomene*), *sex* (male vs. female),  
146 and *body size* (hind tibia length) as:  $\log_{10}(\text{facet count or corneal area}) \sim \text{species} * \text{sex} +$   
147  $\log_{10}(\text{tibia length})$ . Log<sub>10</sub>-transformations were used to normalize the residuals around the

148 allometric relationships to meet the assumptions of normality (Thorpe, 1975). We also used  
149 linear models to assess i) the relationship between facet count and corneal area as:  $\log_{10}(\text{corneal}$   
150  $\text{area}) \sim \log_{10}(\text{facet count}) * \text{species} * \text{sex}$  and ii) body size differences (using hind tibia  
151 length as a body size proxy):  $\log_{10}(\text{tibia length}) \sim \text{species} + \text{sex}$ . The significance of fixed  
152 effect parameters was determined by likelihood ratio tests via the *drop1* function, and  
153 minimum adequate models (MAM) were selected using statistical significance (Crawley,  
154 2013; Nakagawa & Cuthill, 2007). We used the *Anova* function in the *car* package (Fox &  
155 Weisberg, 2018) to estimate significant fixed effect parameters and report false discovery rate  
156 (FDR; Benjamini & Hochberg, 1995) adjusted p-values (*p.adjust* function) to account for  
157 multiple testing. Model assumptions were confirmed via visual inspection (residual vs. fitted  
158 and normal Q-Q plots). To accurately visualize multiple significant fixed effects, we  
159 extracted and plotted the estimated marginal means from each MAM using the *emmeans*  
160 function in the *emmeans* package (Lenth et al., 2023).

161 We also explored whether the scaling relationships between eye morphology (facet  
162 count and corneal area) and body size (hind tibia length) differed for *H. cydno* and *H.*  
163 *melpomene* using major axis regressions via the *sma* function in the *smatr* package (Warton  
164 et al., 2012). Following the standard allometric scaling relationship,  $\log y = \beta \log x + \alpha$ , we  
165 tested for shifts in the allometric slope ( $\beta$ ). Where a common slope was supported, we  
166 subsequently tested for differences in  $\alpha$  that would indicate ‘grade-shifts’ (test = “elevation”)  
167 and for major axis-shifts along the common slope (test = “shift”).

168  
169 *Test of selection.* We next used a quantitative genetics approach to test whether eye  
170 morphology differences between *H. cydno* and *H. melpomene* are due to selection.  $Q_{ST}$  is a  
171 quantitative genetic analogue of  $F_{ST}$  that measures additive genetic variation among  
172 populations relative to total genetic variance. However,  $Q_{ST}$  estimates for quantitative traits

173 are difficult, so  $Q_{ST}$  is often replaced with its phenotypic analogue  $P_{ST}$  (Leinonen et al.,  
174 2013). Comparisons between  $P_{ST}$  and  $F_{ST}$  can be used as a test of divergent selection, where  
175  $P_{ST}$  values that exceed genome-wide  $F_{ST}$  suggest greater phenotypic divergence than expected  
176 by neutral genetic divergence.

177 We calculated  $P_{ST}$  values using the  $Pst$  function in the Pstat package (Silva & Silva,  
178 2018) for raw, log10-transformed, and body-size corrected eye morphology measurements  
179 (i.e., facet count and corneal area). Allometrically scaled body-size correlations (using tibia  
180 length) per species and sex were performed via the *allomr* function in the *allomr* package  
181 (Schär, 2023).  $P_{ST}$  approximation to  $Q_{ST}$  depends on heritability,  $h^2$ , and a scalar  $c$  that  
182 expresses the proportion of the total variance that is presumed to be due to additive genetic  
183 effects across populations (Brommer, 2011). Heritability estimates for facet count and  
184 corneal area are unknown for these species, so in addition to the default value of 1, we used  
185 varying  $c/h^2$  ratios [ranging from 0.33 to 4, following Montgomery et al. (2021)]. Genome-  
186 wide  $F_{ST}$  values between *H. c. chioneus* and *H. m. rosina* were obtained from Martin et al.  
187 (2013), derived from four wild-caught individuals per species using 100-kb genomic  
188 windows. We calculated p-values as the proportion of the  $F_{ST}$  distribution that was above  
189 each  $P_{ST}$  value (Leinonen et al., 2013); values above the 95<sup>th</sup> percentile of the  $F_{ST}$  distribution  
190 were interpreted as an indication of selection.

191

192 *Hybrid phenotypes.* We re-ran the linear models described above but included the CxM and  
193 MxC hybrids as two additional groups within the *species* factor. To test if hybrid body size  
194 was intermediate to *H. cydno* and *H. melpomene*, we also re-tested the linear model:  
195  $\log_{10}(\text{tibia length}) \sim \text{species} + \text{sex}$ . In the case of more than two categories per fixed effect  
196 parameter (i.e., *species*), we used post hoc Tukey tests (*glht-multcomp* package (Hothorn et



197 al., 2008)) to obtain parameter estimates and report Bonferroni adjusted p-values for multiple  
198 comparisons.

199

## 200 **Results**

### 201 Heritable shifts in eye morphology between species residing in different forest types

202 In total, we sampled 15 male and 19 female *H. cydno* and 18 male and 15 female *H.*  
203 *melpomene*, all reared under common garden conditions. Using tibia length as a proxy for  
204 body size, we found that *H. cydno* was larger than *H. melpomene* ( $F_{1,65} = 58.77$ , FDR-p <  
205 0.001), but there was no evidence for sexual size dimorphism in either species (FDR-p = 0.7).  
206 All three fixed effects, *tibia length*, *species*, and *sex*, were retained in our model examining  
207 facet count. After accounting for size (larger butterflies had more facets:  $F_{1,63} = 20.44$ , FDR-  
208 p < 0.001), *H. cydno* had more facets than *H. melpomene* ( $F_{1,63} = 7.32$ , FDR-p = 0.013; Fig.  
209 1B), and males had more facets than females ( $F_{1,63} = 27.35$ , FDR-p < 0.001; Figs. 1C, S2).  
210 The interaction between *species* and *sex* was not significant (FDR-p = 0.7), implying  
211 conserved patterns of sexual dimorphism. We found similar results for corneal area (Fig. 1E,  
212 F), where all three fixed effects were also retained (Table S1). For all butterflies, larger  
213 corneal area was due to an increase in facet number, as evidenced by *facet count* significantly  
214 affecting *corneal area* in the model  $\log_{10}(\text{corneal area}) \sim \log_{10}(\text{facet count}) * \text{species} * \text{sex}$   
215 ( $F_{1,64} = 235.38$ , FDR-p < 0.001). Importantly, the *facet count* x *species* interaction was not  
216 significant in this model (FDR-p = 0.15), suggesting no differences in facet size between  
217 species.

218         Given the sex-specific differences in eye morphology reported above, we analyzed  
219 the scaling relationships between eye morphology and body size for males and females  
220 separately (Fig 1D, G). The only significant difference in slope ( $\beta$ ) was when comparing the  
221 scaling relationship between corneal area and tibia length for *H. cydno* vs. *H. melpomene*

222 males (FDR- $p = 0.016$ ; Table 1); all other comparisons were non-significant, confirming  
223 common slopes (FDR- $p > 0.23$ ; Table 1). In isolation, body size and facet count were  
224 uncorrelated for *H. cydno* males ( $r^2 = 0.004$ ,  $p = 0.8$ ), but there was no statistical difference in  
225 scaling between the species suggesting this is potentially due to increased variance in *H.*  
226 *cydno* (Table 1). For all comparisons with a common slope, tests for grade-shifts ( $\alpha$ ) were  
227 non-significant (FDR- $p > 0.4$ ), but there was a significant shift along the common axis (FDR-  
228  $p < 0.001$ ; Table 1).  
229

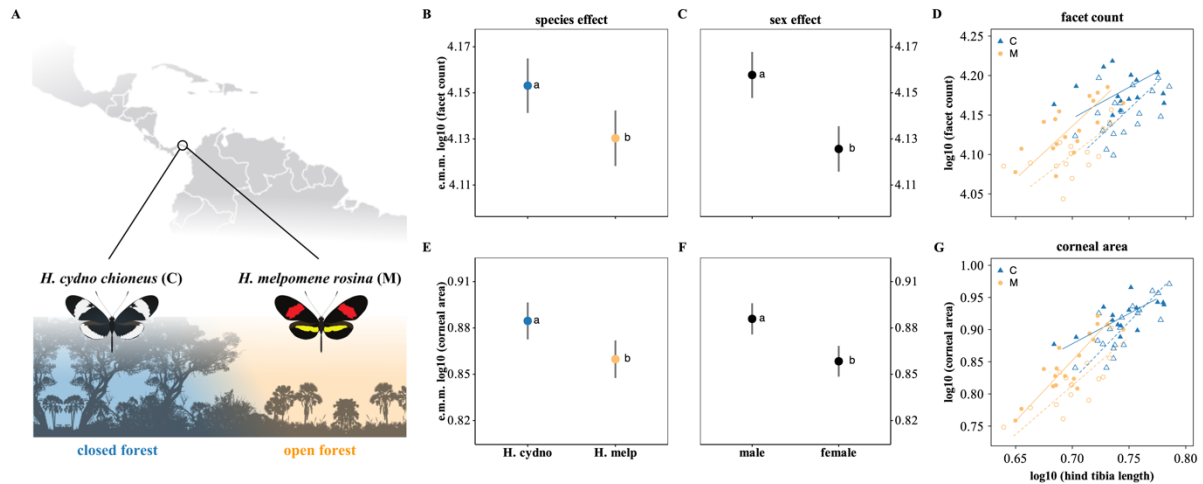

230

231 **Figure 1. (A)** *Heliconius cydno chioneus* and *Heliconius melpomene rosina* occur sympatrically in Panama but

232 occupy different habitats: *H. cydno* is found in closed forest environments, whereas *H. melpomene* resides in

233 open forests. (B, C, E, F) Estimated marginal means (e.m.m.) of the minimum adequate statistical models for

234 (B, C) facet count and (E, F) corneal area, demonstrating the significant effects of (B, E) *species* and (C, F) *sex*,

235 while accounting for other significant terms (*tibia length* and *sex/species*). The interaction between *species* and

236 *sex* was never significant (FDR- $p > 0.13$ ). Different letters indicate significant differences ( $p < 0.05$ ), and the

237 error bars represent 95% confidence intervals. (D, G) Major axis regressions of (D) facet count or (G) corneal

238 area and body size, measured as hind tibia length. Double-logarithmic plots are presented to explore the

239 allometric relationships between eye morphology and body size. Males are represented by solid shapes and solid

240 lines, and females are represented by open shapes and dashed lines. C = *H. cydno*; M = *H. melpomene*.

241

242

|        |              | $\beta$ (slope) |              | $\alpha$ (y intercept)          |              | shift along common axis         |              |
|--------|--------------|-----------------|--------------|---------------------------------|--------------|---------------------------------|--------------|
|        |              | <i>LR</i>       | <i>FDR-p</i> | <i>wald <math>\chi^2</math></i> | <i>FDR-p</i> | <i>wald <math>\chi^2</math></i> | <i>FDR-p</i> |
| male   | facet count  | 2.458           | 0.234        | 0.176                           | 0.650        | 27.44                           | <0.001       |
|        | corneal area | 7.393           | 0.016        | -                               | -            | -                               | -            |
| female | facet count  | 0.4435          | 0.632        | 0.094                           | 0.760        | 27.61                           | <0.001       |
|        | corneal area | 0.5582          | 0.632        | 1.228                           | 0.446        | 34.22                           | <0.001       |

243

244 **Table 1.** Scaling relationships between eye morphology and body size (hind tibia length) for *H. cydno* and *H.*

245 *melpomene* males and females. No values are reported for male corneal area because tests for grade shifts ( $\alpha$ )

246 and shifts along the common axis are only appropriate with a common slope.

247

#### 248 Differences in eye morphology are driven by selection

249 Our  $P_{ST}$ - $F_{ST}$  analyses suggest that the visual systems of *H. cydno* and *H. melpomene* have

250 likely diverged as the result of selection rather than genetic drift.  $P_{ST}$  was significantly higher

251 than  $F_{ST}$  for both facet count and corneal area ( $p < 0.001$ ) for all comparisons (Fig. 2; Table

252 S3), where the proportion of phenotypic variance due to additive genetic effects within-

253 populations far exceeds the proportion of phenotypic variance due to additive genetic effects

254 between-populations. Qualitatively similar results were obtained regardless of the phenotypic

255 measurement evaluated (i.e., raw data, log10 transformed, allometrically corrected values;

256 Table S3) and also when each sex was examined separately (Tables S4, S5).

257

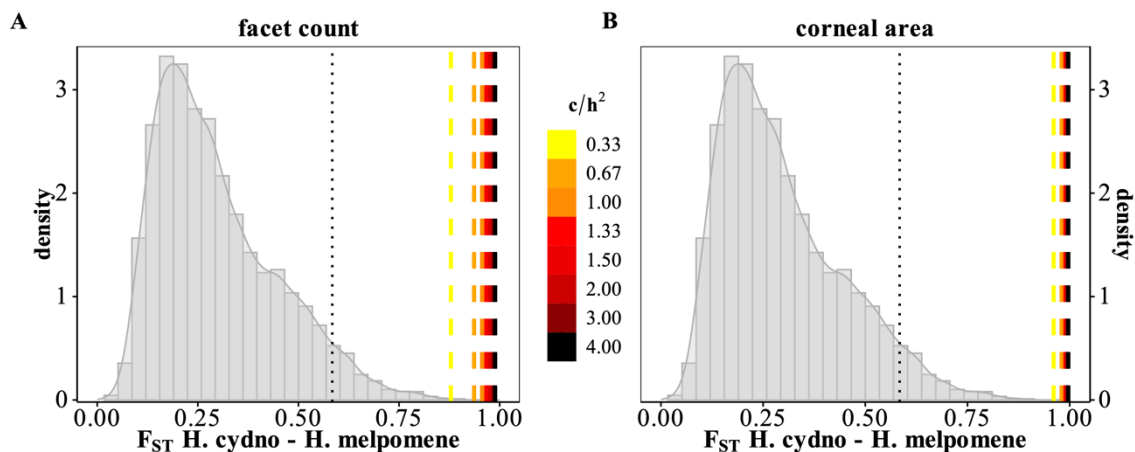

258

259 **Figure 2.** Location of the calculated  $P_{ST}$  values for (A) facet count and (B) corneal area in the distribution of  $F_{ST}$   
260 values between *H. cydno chioneus* and *H. melpomene rosina* (values from Martin et al., 2013). Here, both  
261 morphological measurements are allometrically corrected using tibia length as a body-size proxy and presented  
262 using varying  $c/h^2$  ratios (see Table S3 for  $P_{ST}$  estimates using raw and log10 transformed values). The dotted  
263 line represents the 95<sup>th</sup> percentile of the  $F_{ST}$  distribution.

264

### 265 Hybrid eye morphology is *H. melpomene*-like

266 We examined the eye morphology of 60 F1 hybrids, including 15 male and 15 female CxM  
267 individuals, and 15 female and 15 male MxC individuals (Table S2). Tukey post hoc (with  
268 Bonferroni correction) revealed patterns of intermediacy in body size (using tibia length as a  
269 body size proxy) for both hybrid types compared to the parental species: both CxM and MxC  
270 hybrids were larger than *H. melpomene* ( $p < 0.001$ ), MxC was smaller than *H. cydno* ( $t = -$   
271 3.148,  $p = 0.0124$ ), and CxM did not differ from *H. cydno* ( $p = 1.0$ ; Fig. 3A). However, F1  
272 hybrid eye morphology was not intermediate to the parental species: both hybrid types had  
273 significantly fewer facets ( $p < 0.0035$ ) than *H. cydno* but did not differ from *H. melpomene* ( $p$   
274  $= 1.0$ ; Fig. 3B). Results for corneal area were similar (Table S2; Fig. S3, S4). These patterns  
275 were also evident when exploring the scaling relationships between eye morphology and  
276 body size of the F1 hybrids (Fig. 3C, D; Fig. S4).

277

278

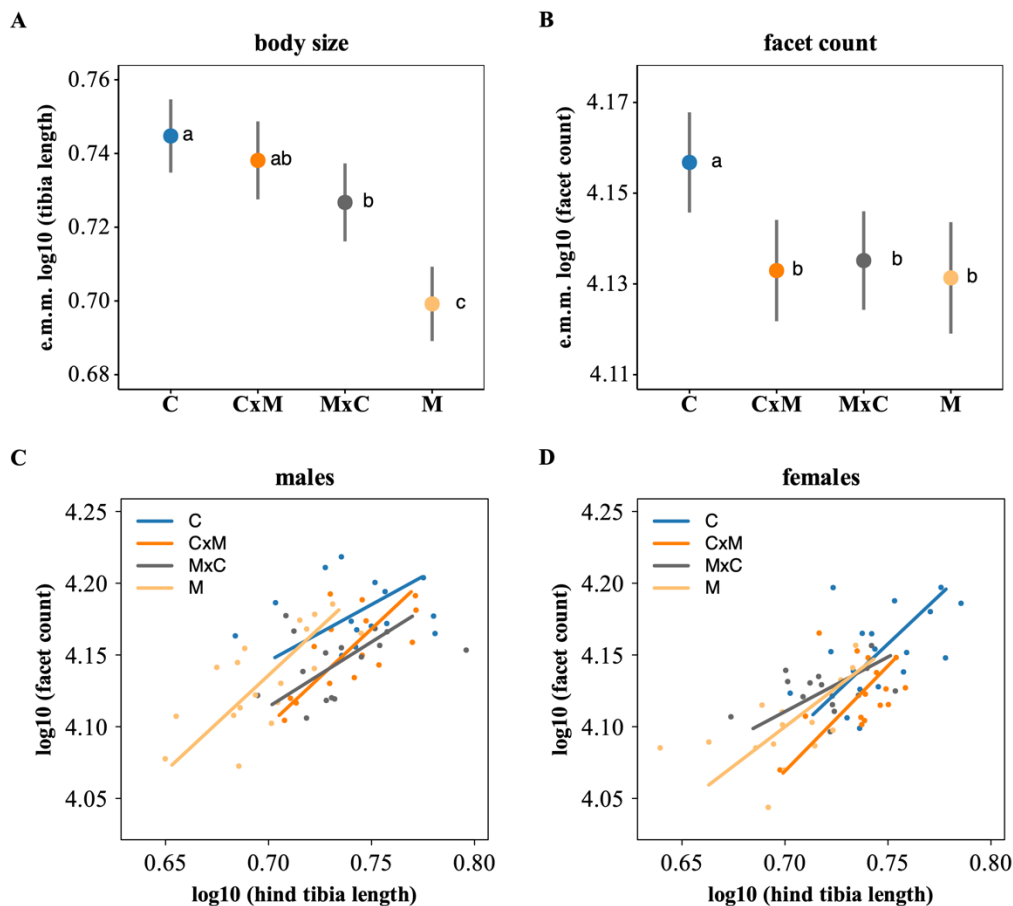

279

280 **Figure 3.** (A) Estimated marginal means (e.m.m.) of the minimum adequate statistical model for body size  
281 (using tibia length as a proxy) including F1 hybrids, demonstrating the significant effect of *species* (*sex* was  
282 non-significant, FDR-p = 0.48). E.m.m for (B) facet count, showing the significant effect of *species*, while  
283 accounting for significant *tibia length* and *sex* effects. In both plots, different letters indicate significant  
284 differences (Bonferroni adjusted  $p < 0.05$ ), and the error bars represent 95% confidence intervals. (C-D) Major  
285 axis regressions of facet count and body size (tibia length) for males and females separately. Double-logarithmic  
286 plots are presented to explore the allometric relationships between eye morphology and body size. C = *H.*  
287 *cydno*; M = *H. melpomene*; CxM = F1 hybrid of *H. cydno* mother crossed with *H. melpomene* father; MxC = F1  
288 hybrid of *H. melpomene* mother crossed with *H. cydno* father.

289

## 290 **Discussion**

291 When populations are exposed to different sensory conditions, natural selection may favor  
292 divergence in sensory traits, which can contribute to speciation. We compared the outer eye  
293 morphology of *Heliconius* butterflies that occupy different environments to test for patterns  
294 of adaptive visual system divergence. Our results show that *H. cydno*, which occupies more  
295 visually complex closed-canopy forests, has larger eyes, and that this is a result of heritable  
296 differences in facet number. By combining our phenotypic data with genome wide estimates  
297 of  $F_{ST}$ , we additionally provide strong evidence that selection has driven the divergence of  
298 eye morphology in these butterflies. Finally, we show that F1 hybrid eye morphology is not  
299 intermediate to the parental species, contrasting with patterns for body size and neural  
300 anatomy. This suggests that visual processing in hybrids may be disrupted by mismatches in  
301 different parts of the visual pathway.

302 Our results are consistent with previous work by Seymoure et al. (2015), which  
303 reported larger eyes for *H. cydno*, and bigger eyes in *H. cydno* (but not *H. melpomene*) males.  
304 However, the individuals sampled for our analyses were raised under common garden  
305 conditions, reducing the potential for environmental effects and genotype–environment  
306 interactions, which may give a distorted picture of the contribution of genetic variation on  
307 which selection can act (Brommer, 2011; Pujol et al., 2008). A potential caveat of our results  
308 is that we cut each cuticle four times to mount it on the microscope slides, which may have  
309 disrupted the semi-automated counts of individual facets. It is possible that more advanced  
310 3D imaging techniques (e.g., Buffry et al., 2023), where cutting is not required, may give  
311 slightly higher total counts, though likely at the expense of overall sample size and associated  
312 statistical power. Regardless, our facet counts are consistent with prior work (Seymoure et  
313 al., 2015) (Fig. S1), and the close correspondence between wild and insectary-reared  
314 butterflies further suggests that the differences in eye morphology are largely heritable.

315 Habitat-associated variation in eye morphology has been reported across taxa (e.g.,  
316 insects: (Greiner, 2006); mammals: (Veilleux & Lewis, 2011); fish: (Lisney et al., 2020);  
317 snakes: (Liu et al., 2012); primates: (Kirk, 2004)), and this variation is generally interpreted  
318 as an adaptive response to the local sensory conditions. For example, visual perception in  
319 insects is affected by the total number of ommatidia and their size/density (Greiner, 2006;  
320 Land, 1997; Warrant, 2004), and nocturnal and crepuscular species often possess larger eyes  
321 and larger facets to enhance photon sensitivity in low-light environments (Freelance et al.,  
322 2021). However, most studies do not formally evaluate the role of selection, which is a key  
323 element to define adaptation (Gould & Vrba, 1982). We are aware of only one study that has  
324 attempted to address this topic: Brandon et al. (2015) reported that eye size variation in a  
325 wild *Daphnia* population is associated with variation in fitness (reproductive output),  
326 suggesting that selection is operating, either directly or indirectly, on eye size variation  
327 (though the underlying mechanisms remain unknown).

328 In addition to revealing heritable differences in eye morphology, our results suggest  
329 that eye morphology in *H. cydno* and *H. melpomene* have evolved as the result of divergent  
330 selection, as opposed to genetic drift. Although our  $P_{ST}$ - $F_{ST}$  approach to test for evidence of  
331 selection acting on eye morphology is limited by the difficulty in approximating  $P_{ST}$  to  $Q_{ST}$   
332 (Brommer, 2011), these limitations are largely overcome by rearing our butterflies under  
333 common garden conditions (Leinonen et al., 2008, 2013). Moreover, as with most insects, the  
334 heritability of facet count and corneal area are unknown for the species used in this study. To  
335 account for this, we used a wide range of  $c/h^2$  ratios, including the default assumption of  $c =$   
336  $h^2$  (i.e.,  $c/h^2 = 1$ ), where the proportion of phenotypic variance due to additive genetic effects  
337 is the same for between-population variance and within-population variance (Brommer,  
338 2011). In all cases,  $P_{ST}$  values were higher than the 95<sup>th</sup> percentile of the genome wide  $F_{ST}$   
339 distribution (Tables S3-S5).



340 In insects, eye size may increase due to an increase in the number of ommatidia, an  
341 increase in individual ommatidia size, or both. Our results suggest that larger eye size in *H.*  
342 *cydno*, and in males of both species, is predominantly due to an increase in ommatidia  
343 number. We did not measure facet diameter directly, but we found no effect of the *facet*  
344 *count x species* interaction on *corneal area*, suggesting no interspecific differences in facet  
345 size. Seymoure et al. (2015) measured facet diameter from a subset of ommatidia in six  
346 anatomical eye regions and reported larger facet diameter in wild *H. cydno* compared to *H.*  
347 *melpomene*, with no differences between sexes. However, these results stemmed from an  
348 analysis of covariance including other species (*H. sapho* and *H. erato*); there were no direct  
349 comparisons between *H. cydno* and *H. melpomene*. Future studies may benefit from  
350 exploring facet diameter more directly. Regardless, the larger eyes of *H. cydno*, and male  
351 *Heliconius*, appear to be largely due to an increase in ommatidia number. In insects,  
352 increased ommatidia number is thought to contribute to higher visual acuity (Land, 1997) -  
353 behavioral and morphological data revealing sexual dimorphism in the visual acuity of *H.*  
354 *erato* support this prediction (Wright et al., 2023). We note that our allometric analyses  
355 suggest part of the variation we observe is associated with body size, within and between  
356 species. However, our  $P_{ST}$ - $F_{ST}$  analyses account for body size and still suggest a signal of  
357 selection. The pattern we observe in hybrids, where grade-shifts are clearly observed between  
358 *cydno* and *cydno x melpomene* hybrids (Figure 3C), also suggest a strong genetic component  
359 independent of body size. As such, while the behavioural impact of increased eye size likely  
360 depends on the raw numbers of facets, we conclude that selection on body size alone does not  
361 explain the increase in *cydno* eye size.

362 Multiple non-exclusive selective pressures could be driving the differences we report  
363 here. First, species differences may be explained by *H. cydno* occupying more complex  
364 closed-forest environments (Estrada & Jiggins, 2002), where more ommatidia are

365 advantageous due to e.g., increased visual acuity (Land, 1997; Wright et al., 2023). More  
366 ommatidia in males may also be due to general ecological differences between the sexes, as  
367 males actively search for and identify mates (Rutowski, 2000; Yagi & Koyama, 1963).  
368 Interestingly, species differences persist for both sexes (Fig. S2) and when exploring the  $P_{ST}$ -  
369  $F_{ST}$  results for each sex separately, we still observed evidence of selection (Tables S4, S5).  
370 Taken together, our results suggest that the selective pressure on males to have more  
371 ommatidia acts in both species in concert with selection for more ommatidia in closed-forest  
372 environments. Similar patterns may exist across *Heliconius*, but to date, few species have  
373 been surveyed for eye morphology.

374 Our results also mirror neuroanatomical comparisons between species across the  
375 *cydno-melpomene* clade, where larger visual neuropils are reported for *cydno*-clade species  
376 occupying closed-forest environments, as opposed to *H. melpomene* (Montgomery et al.,  
377 2021). These neural differences appear to be heritable adaptations, based on similar tests of  
378 selection to those reported here. Thus, the combined results on brain morphology  
379 (Montgomery et al., 2021) and those presented here suggest whole visual system adaptation,  
380 from the sensory periphery to the brain. Similar habitat-associated differences in  
381 neuroanatomy have been reported in other Neotropical butterflies (Montgomery & Merrill,  
382 2017; Wainwright & Montgomery, 2022), indicating a broader pattern of sensory adaptation  
383 in ecologically divergent, but closely related, butterflies.

384 One notable difference in the results obtained for eye and neural traits, however, is in  
385 the pattern of variation among F1 interspecific hybrids. The eye morphology of *H. cydno* and  
386 *H. melpomene* F1 hybrids tended to be more *H. melpomene*-like. This contrasts with patterns  
387 for body size (Fig. 3A) and neuroanatomy, where hybrids are intermediate for at least some  
388 traits (Montgomery et al., 2021). The observation that hybrid eye morphology is *melpomene*-  
389 like, but hybrid body size tends to be intermediate indicates that these two traits have

390 different underlying genetic architectures (i.e., eye size is not simply genetically correlated  
391 with increasing body size). Furthermore, evidence suggests that both eye morphology (this  
392 study) and neural anatomy (Montgomery et al., 2021) are under divergent selection and in the  
393 predicted direction (i.e., bigger eyes and larger visual neuropils in *H. cydno*). If these  
394 observations truly represent adaptations (as our results suggest), then hybrids may have  
395 suboptimal visual system functioning, whereby peripheral sensory structures (number of  
396 facets) are mismatched to subsequent processing regions (optic lobe neuropils). This would  
397 predict that hybrids suffer a fitness deficit due to lower performance in visually oriented  
398 tasks, such as foraging and mate detection, but behavioral experiments are required to test  
399 these predictions. In conclusion, the adaptive differences in eye structure we observe may  
400 contribute to ecologically based pre- and post-mating reproductive barriers.

401

## 402 **Acknowledgements**

403 We thank Josephine Dessmann, Maria-Clara Melo, Moises Abanto, Adraia Tapia, Liz Evans  
404 for helping raise butterflies. We thank the Smithsonian Tropical Research Institute for  
405 providing research infrastructure, and the Autoridad Nacional del Ambiente for permission to  
406 collect butterflies in Panama (permit no. SE/A-22-09). This work was supported by a NERC  
407 Independent Research Fellowship (NE/N014936/1) to SHM, and a DFG Emmy Noether  
408 fellowship (Number: GZ: ME 4845/1-1) and an ERC starting grant (Grant number: 851040)  
409 to RMM.

410

## 411 **Data availability**

412 The underlying data and R-scripts supporting the findings of this study are available at  
413 [https://github.com/SpeciationBehaviour/Adaptive\\_divergence\\_Heliconius\\_eyes](https://github.com/SpeciationBehaviour/Adaptive_divergence_Heliconius_eyes).

## 414 **References**

- 415 Benjamini, Y., & Hochberg, Y. (1995). Controlling the false discovery rate: A practical and  
416 powerful approach to multiple testing. *Journal of the Royal Statistical Society: Series*  
417 *B (Methodological)*, 57(1), 289–300.
- 418 Brandon, C. S., James, T., & Dudycha, J. L. (2015). Selection on incremental variation of eye  
419 size in a wild population of *Daphnia*. *Journal of Evolutionary Biology*, 28(11), 2112–  
420 2118. <https://doi.org/10.1111/jeb.12711>
- 421 Brommer, J. E. (2011). Whither Pst? The approximation of Qst by Pst in evolutionary and  
422 conservation biology. *Journal of Evolutionary Biology*, 24(6), 1160–1168.  
423 <https://doi.org/10.1111/j.1420-9101.2011.02268.x>
- 424 Buffry, A. D., Currea, J. P., Franke, F. A., Palavalli-Nettimi, R., Bodey, A. J., Rau, C.,  
425 Samadi, N., Gstöhl, S. J., Schlepütz, C. M., McGregor, A. P., Sumner-Rooney, L.,  
426 Theobald, J., & Kittelmann, M. (2023). *Evolution of compound eye morphology*  
427 *underlies differences in vision between closely related Drosophila species* [Preprint].  
428 *Evolutionary Biology*. <https://doi.org/10.1101/2023.07.16.549164>
- 429 Carleton, K. L., & Yourick, M. R. (2020). Axes of visual adaptation in the ecologically  
430 diverse family Cichlidae. *Seminars in Cell & Developmental Biology*, 106, 43–52.  
431 <https://doi.org/10.1016/j.semcdb.2020.04.015>
- 432 Crane. (1955). Imaginal behaviour of a Trinidad butterfly, *Heliconius erato hydra* Hewitson,  
433 with special reference to the social use of color. *Zoologica*, 40, 167–196.
- 434 Crawley, M. J. (2013). *The R book* (Second edition). Wiley.
- 435 Cummings, M. E., & Endler, J. A. (2018). 25 Years of sensory drive: The evidence and its  
436 watery bias. *Current Zoology*, 64(4), 471–484. <https://doi.org/10.1093/cz/zoy043>
- 437 Dell’Aglia, D. D., Losada, M. E., & Jiggins, C. D. (2016). Butterfly Learning and the  
438 Diversification of Plant Leaf Shape. *Frontiers in Ecology and Evolution*, 4.

- 439 Dell'Aglio, D. D., Rivas-Sánchez, D. F., Wright, D. S., Merrill, R. M., & Montgomery, S. H.  
440 (2023). The sensory ecology of speciation. *Cold Spring Harbor Perspectives in*  
441 *Biology*.
- 442 DeVries, P. J. (1987). *The Butterflies of Costa Rica and their natural history*. New Jersey,  
443 US: Princeton University Press.
- 444 Endler, J. A. (1993). The color of light in forests and its implications. *Ecological*  
445 *Monographs*.
- 446 Estrada, C., & Jiggins, C. D. (2002). Patterns of pollen feeding and habitat preference among  
447 *Heliconius* species. *Ecological Entomology*, 27(4), 448–456.  
448 <https://doi.org/10.1046/j.1365-2311.2002.00434.x>
- 449 Estrada, C., & Jiggins, C. D. (2008). Interspecific sexual attraction because of convergence in  
450 warning colouration: Is there a conflict between natural and sexual selection in  
451 mimetic species? *Journal of Evolutionary Biology*, 21(3), 749–760.  
452 <https://doi.org/10.1111/j.1420-9101.2008.01517.x>
- 453 Fox, J., & Weisberg, S. (2018). *An R Companion to Applied Regression*. SAGE Publications.
- 454 Frederiksen, R., & Warrant, E. J. (2008). Visual sensitivity in the crepuscular owl butterfly  
455 *Caligo memnon* and the diurnal blue morpho *Morpho peleides*: A clue to explain the  
456 evolution of nocturnal apposition eyes? *Journal of Experimental Biology*, 211(6),  
457 844–851. <https://doi.org/10.1242/jeb.012179>
- 458 Freelance, C. B., Tierney, S. M., Rodriguez, J., Stuart-Fox, D. M., Wong, B. B. M., & Elgar,  
459 M. A. (2021). The eyes have it: Dim-light activity is associated with the morphology  
460 of eyes but not antennae across insect orders. *Biological Journal of the Linnean*  
461 *Society*, 134(2), 303–315. <https://doi.org/10.1093/biolinnean/blab088>
- 462 Gilbert, L. E. (1982). The coevolution of a butterfly and a vine. *Scientific American*, 247(2),  
463 110–121.

- 464 Gould, S. J., & Vrba, E. S. (1982). Exaptation—A missing term in the science of form.  
465 *Paleobiology*, 8(1), 4–15.
- 466 Greiner, B. (2006). Adaptations for nocturnal vision in insect apposition eyes. *International*  
467 *Review of Cytology*, 250, 1–46.
- 468 Hausmann, A. E., Kuo, C.-Y., Freire, M., Rueda-M, N., Linares, M., Pardo-Diaz, C., Salazar,  
469 C., & Merrill, R. M. (2021). Light environment influences mating behaviours during  
470 the early stages of divergence in tropical butterflies. *Proceedings of the Royal Society*  
471 *B: Biological Sciences*, 288(1947). <https://doi.org/10.1098/rspb.2021.0157>
- 472 Hothorn, T., Bretz, F., & Westfall, P. (2008). Simultaneous Inference in General Parametric  
473 Models. *Biometrical Journal*, 50(3), 346–363.  
474 <https://doi.org/10.1002/bimj.200810425>
- 475 Jiggins, C. D., Naisbit, R. E., Coe, R. L., & Mallet, J. (2001). Reproductive isolation caused  
476 by colour pattern mimicry. *Nature*, 411(6835), 302–305.  
477 <https://doi.org/10.1038/35077075>
- 478 Kirk, E. C. (2004). Comparative morphology of the eye in primates. *The Anatomical Record*  
479 *Part A: Discoveries in Molecular, Cellular, and Evolutionary Biology*, 281A(1),  
480 1095–1103. <https://doi.org/10.1002/ar.a.20115>
- 481 Land, M. F. (1997). Visual acuity in insects. *Annual Review of Entomology*, 42(1), 147–177.  
482 <https://doi.org/10.1146/annurev.ento.42.1.147>
- 483 Leinonen, T., McCairns, R. J. S., O'Hara, R. B., & Merilä, J. (2013). QST-FST comparisons:  
484 Evolutionary and ecological insights from genomic heterogeneity. *Nature Reviews*.  
485 *Genetics*, 14(3), 179–190. <https://doi.org/10.1038/nrg3395>
- 486 Leinonen, T., O'hara, R. B., Cano, J. M., & Merilä, J. (2008). Comparative studies of  
487 quantitative trait and neutral marker divergence: A meta-analysis. *Journal of*  
488 *Evolutionary Biology*, 21(1), 1–17. <https://doi.org/10.1111/j.1420-9101.2007.01445.x>

- 489 Lenth, R. V., Bolker, B., Buerkner, P., Giné-Vázquez, I., Herve, M., Jung, M., Love, J.,  
490 Miguez, F., Riebl, H., & Singmann, H. (2023). *emmeans: Estimated Marginal Means,*  
491 *aka Least-Squares Means* (1.8.7) [Computer software]. [https://cran.r-](https://cran.r-project.org/web/packages/emmeans/index.html)  
492 [project.org/web/packages/emmeans/index.html](https://cran.r-project.org/web/packages/emmeans/index.html)
- 493 Lisney, T. J., Collin, S. P., & Kelley, J. L. (2020). The effect of ecological factors on eye  
494 morphology in the western rainbowfish, *Melanotaenia australis*. *Journal of*  
495 *Experimental Biology*, 223(10), jeb223644. <https://doi.org/10.1242/jeb.223644>
- 496 Liu, Y., Ding, L., Lei, J., Zhao, E., & Tang, Y. (2012). Eye size variation reflects habitat and  
497 daily activity patterns in colubrid snakes. *Journal of Morphology*, 273(8), 883–893.  
498 <https://doi.org/10.1002/jmor.20028>
- 499 Martin, S. H., Dasmahapatra, K. K., Nadeau, N. J., Salazar, C., Walters, J. R., Simpson, F.,  
500 Blaxter, M., Manica, A., Mallet, J., & Jiggins, C. D. (2013). Genome-wide evidence  
501 for speciation with gene flow in *Heliconius* butterflies. *Genome Research*, 23(11),  
502 1817–1828. <https://doi.org/10.1101/gr.159426.113>
- 503 McCulloch, K. J., Yuan, F., Zhen, Y., Aardema, M. L., Smith, G., Llorente-Bousquets, J.,  
504 Andolfatto, P., & Briscoe, A. D. (2017). Sexual Dimorphism and Retinal Mosaic  
505 Diversification following the Evolution of a Violet Receptor in Butterflies. *Molecular*  
506 *Biology and Evolution*, 34(9), 2271–2284. <https://doi.org/10.1093/molbev/msx163>
- 507 Merrill, R., Rastas, P., Martin, S. H., Melo, M. C., Barker, S., Davey, J., McMillan, W. O., &  
508 Jiggins, C. D. (2019). Genetic dissection of assortative mating behavior. *PLoS*  
509 *Biology*, 17(2), e2005902-21. <https://doi.org/10.1371/journal.pbio.2005902>
- 510 Montgomery, S. H., & Merrill, R. (2017). Divergence in brain composition during the early  
511 stages of ecological specialization in *Heliconius* butterflies. *Journal of Evolutionary*  
512 *Biology*, 30(3), 571–582. <https://doi.org/10.1111/jeb.13027>

- 513 Montgomery, S. H., Rossi, M., McMillan, W. O., & Merrill, R. M. (2021). Neural divergence  
514 and hybrid disruption between ecologically isolated *Heliconius* butterflies.  
515 *Proceedings of the National Academy of Sciences*, 118(6).  
516 <https://doi.org/10.1073/pnas.2015102118>
- 517 Nakagawa, S., & Cuthill, I. C. (2007). Effect size, confidence interval and statistical  
518 significance: A practical guide for biologists. *Biological Reviews*, 82(4), 591–605.  
519 <https://doi.org/10.1111/j.1469-185X.2007.00027.x>
- 520 Pujol, B., Wilson, A. J., Ross, R. I. C., & Pannell, J. R. (2008). Are  $Q_{ST}$ – $F_{ST}$  comparisons  
521 for natural populations meaningful? *Molecular Ecology*, 17(22), 4782–4785.  
522 <https://doi.org/10.1111/j.1365-294X.2008.03958.x>
- 523 Rosenthal, G. G. (2018). Evaluation and hedonic value in mate choice. *Current Zoology*,  
524 64(4), 485–492. <https://doi.org/10.1093/cz/zoy054>
- 525 Rutowski, R. L. (2000). Variation of eye size in butterflies: Inter-and intraspecific patterns.  
526 *Journal of Zoology*, 252(2), 187–195.
- 527 Schär, S. (2023). *Package allomr: Removing Allometric Effects of Body Size in*  
528 *Morphological Analysis*.
- 529 Schindelin, J., Arganda-Carreras, I., Frise, E., Kaynig, V., Longair, M., Pietzsch, T.,  
530 Preibisch, S., Rueden, C., Saalfeld, S., Schmid, B., Tinevez, J.-Y., White, D. J.,  
531 Hartenstein, V., Eliceiri, K., Tomancak, P., & Cardona, A. (2012). Fiji: An open-  
532 source platform for biological-image analysis. *Nature Methods*, 9(7), Article 7.  
533 <https://doi.org/10.1038/nmeth.2019>
- 534 Seymoure, B. M. (2016). *Heliconius In A New Light: The Effects of Light Environments on*  
535 *Mimetic Coloration, Behavior, and Visual Systems*.
- 536 Seymoure, B. M., Mcmillan, W. O., & Rutowski, R. (2015). Peripheral eye dimensions in  
537 Longwing (*Heliconius*) butterflies vary with body size and sex but not light



- 538 environment nor mimicry ring. *The Journal of Research on the Lepidoptera*, 48, 83–  
539 92. <https://doi.org/10.5962/p.266475>
- 540 Silva, S., Blondeau, Da, & Silva, A., Da. (2018). Pstat: An R Package to Assess Population  
541 Differentiation in Phenotypic Traits. *The R Journal*, 10(1), 447.  
542 <https://doi.org/10.32614/RJ-2018-010>
- 543 Stevens, M. (2013). *Sensory ecology, behaviour, and evolution* (First edition). Oxford  
544 University Press.
- 545 Stöckl, A., Smolka, J., O’Carroll, D., & Warrant, E. (2017). Resolving the Trade-off Between  
546 Visual Sensitivity and Spatial Acuity—Lessons from Hawkmoths. *Integrative and  
547 Comparative Biology*, 57(5), 1093–1103. <https://doi.org/10.1093/icb/ix058>
- 548 Thorpe, R. (1975). Quantitative handling of characters useful in snake systematics with  
549 particular reference to intraspecific variation in the ringed snake *Natrix natrix* (L.).  
550 *Biological Journal of the Linnean Society*, 7(1), 27–43.
- 551 Veilleux, C. C., & Lewis, R. J. (2011). Effects of Habitat Light Intensity on Mammalian Eye  
552 Shape. *The Anatomical Record*, 294(5), 905–914. <https://doi.org/10.1002/ar.21368>
- 553 Wainwright, J. B., & Montgomery, S. H. (2022). Neuroanatomical shifts mirror patterns of  
554 ecological divergence in three diverse clades of mimetic butterflies. *Evolution*, 76(8),  
555 1806–1820. <https://doi.org/10.1111/evo.14547>
- 556 Warrant, E. (2004). Vision in the dimmest habitats on earth. *Journal of Comparative  
557 Physiology A*, 190, 765–789.
- 558 Warton, D. I., Duursma, R. A., Falster, D. S., & Taskinen, S. (2012). Smatr 3– an R package  
559 for estimation and inference about allometric lines. *Methods in Ecology and  
560 Evolution*, 3(2), 257–259. <https://doi.org/10.1111/j.2041-210X.2011.00153.x>
- 561 Webster, M. A. (2015). Visual Adaptation. *Annual Review of Vision Science*, 1(1), 547–567.  
562 <https://doi.org/10.1146/annurev-vision-082114-035509>

- 563 Wright, D. S., Manel, A., Guachamin-Rosero, M., Chamba-Vaca, P., Bacquet, C. N., &  
564 Merrill, R. M. (2023). Quantifying visual acuity in *Heliconius* butterflies. *bioRxiv*,  
565 <https://doi.org/10.1101/2023.07.10.548283>.
- 566 Yagi, N., & Koyama, N. (1963). *The Compound Eye of Lepidoptera*. Shinkyō Press, Tokyo.  
567
